# Supplementary material for: Revealing the effect of interfacial electron transfer in heterostructured Co9S8@NiFe LDH for enhanced electrocatalytic oxygen evolution
Source: Royal Society of Chemistry journal article supplement (doi:10.1039/d1ta02318g), 2021-01-01
Supplement: d1ta02318g1.pdf [file d1ta02318g1.pdf]

## Supplementary Information

# Revealing Effect of Interfacial Electron Transfer in Heterostructured Co<sub>9</sub>S<sub>8</sub>@NiFe LDH for Enhanced Electrocatalytic Oxygen Evolution

Xueting Feng,<sup>a, d</sup> Qingze Jiao,<sup>a, c</sup> Zheng Dai,<sup>a</sup> Yanliu Dang,<sup>e</sup> Steven L. Suib,<sup>d, e</sup> Jiatao

Zhang,<sup>a</sup> Yun Zhao,<sup>a</sup> Hansheng Li,<sup>a</sup> Caihong Feng<sup>a, \*</sup> Anran Li<sup>b, \*</sup>

<sup>a</sup> Beijing Key Laboratory for Chemical Power Source and Green Catalysis,

School of Chemistry and Chemical Engineering, Beijing Institute of Technology,

Beijing 100081, People's Republic of China

<sup>b</sup> Beijing Advanced Innovation Center for Big Data-Based Precision Medicine,

School of Engineering Medicine, Beihang University, Beijing 100191, People's

Republic of China

<sup>c</sup> School of Materials and Environment, Beijing Institute of Technology, Jinfeng Road

No.6, Xiangzhou District, Zhuhai 519085, People's Republic of China

<sup>d</sup> Department of Chemistry, University of Connecticut, U-3060, 55 N. Eagleville

Road, Storrs, Connecticut 06269, United States

<sup>e</sup> Institute of Materials Science, University of Connecticut, U-3136, 97 N. Eagleville

Road, Storrs, Connecticut 06269, United States.

**Corresponding Author**

\*Email: [fengch@bit.edu.cn](mailto:fengch@bit.edu.cn) (Caihong Feng)

\*Email: [rananli@buaa.edu.cn](mailto:rananli@buaa.edu.cn) (Anran Li)

## EXPERIMENTAL SECTION

**Materials.** Cobalt sulfate heptahydrate ( $\text{CoSO}_4 \cdot 7\text{H}_2\text{O}$ ), Iron nitrate nonahydrate ( $\text{Fe}(\text{NO}_3)_3 \cdot 9\text{H}_2\text{O}$ ), Nickel(II) nitrate hexahydrate ( $\text{Ni}(\text{NO}_3)_2 \cdot 6\text{H}_2\text{O}$ ), thiourea ( $\text{CH}_4\text{N}_2\text{S}$ ), urea, ethylene glycol (EG) and N,N-dimethylformamide (DMF) were purchased from Beijing Chemical Reagent Company. Nafion (5 wt%) were purchased from Alfa Aesar. All chemicals were analytical grade and used without further purification.

**Preparation of the catalyst ink:** 4 mg of the samples, 0.5 mg of super P and 30  $\mu\text{L}$  of Nafion solution (5 wt%) were dispersed into 970  $\mu\text{L}$  of 1:1 v/v isopropanol/water and sonicated for 1 h. The catalyst ink (10  $\mu\text{L}$ ) was deposited on a GC electrode, resulting in a mass loading of 0.2  $\text{mg}/\text{cm}^2$ . The contrastive samples, including  $\text{Co}_9\text{S}_8$ , NiFe LDH and commercial  $\text{IrO}_2$ , were also investigated using the same mass loading.

**Calculation of the Theoretical OER Activity:** The overall OER process includes four elementary steps:

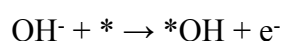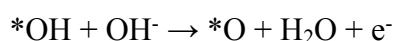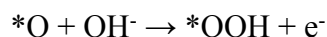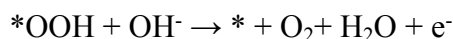

where \* and  $\text{X}^*$  represent an adsorption site and an adsorbed X intermediate on the surface, respectively. Since calculating the thermochemistry of the OER under acidic condition is more convenient, the following elementary steps proposed by Nørskov et al. are considered, which are equivalent to the reactions shown above:<sup>1-3</sup>

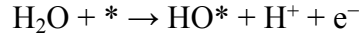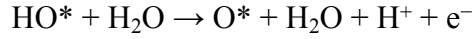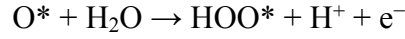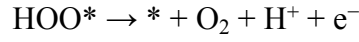

The free energy of  $\text{H}^+ + \text{e}^-$  can be calculated as half of the formation energy of  $\text{H}_2$  at 298 K and 1 atm. The free energy of the OER is computed by  $\Delta G = \Delta E + \Delta \text{ZPE} - T\Delta S$ , where  $\Delta E$  can be obtained by the computation of geometrical structures, and  $\Delta \text{ZPE}$  and  $\Delta S$  can be determined by computing vibrational frequencies and standards tables for the reactants and products in the gas phase.<sup>4,5</sup> Therefore, the Gibbs free energy changes of each step can be computed based on the following equations:

$$\Delta G_1 = E(\text{HO}^*) - E(*) - E_{\text{H}_2\text{O}} + 1/2E_{\text{H}_2} + (\Delta \text{ZPE} - T\Delta S)_1 - eU$$

$$\Delta G_2 = E(\text{O}^*) - E(\text{HO}^*) + 1/2E_{\text{H}_2} + (\Delta \text{ZPE} - T\Delta S)_2 - eU$$

$$\Delta G_3 = E(\text{HOO}^*) - E(\text{O}^*) - E_{\text{H}_2\text{O}} + 1/2E_{\text{H}_2} + (\Delta \text{ZPE} - T\Delta S)_3 - eU$$

$$\Delta G_4 = E(*) - E(\text{HOO}^*) + E_{\text{O}_2} + 1/2E_{\text{H}_2} + (\Delta \text{ZPE} - T\Delta S)_4 - eU$$

Here,  $-eU$  term is included in the computation of reaction free energy, representing the applied external bias  $U$ .

Hu et al. found that the Fe sites had TOFs 20-200 times higher than the Ni sites such that at an Fe content of 4.7% and above the Fe sites dominate the catalysis.<sup>6</sup> They also showed that the OER catalytic activity of Ni-containing oxides upon Fe incorporation is dramatically increased due to the creation of a highly reactive surface active site, mostly likely based on Fe.<sup>7</sup> However, some works shows that the OER activity for  $\text{M}^{2+\delta}\text{O}^\delta(\text{OH})_{2-\delta}/\text{Pt}(111)$  catalyst ( $\text{M}=\text{Ni}, \text{Co}, \text{Fe}, \text{Mn}$ ) follows the order

Ni>Co>Fe>Mn.<sup>8</sup> In our work, the theoretical Fe content was more than 4.7%, and thus Fe sites were selected for the investigation of the OER processes in the DFT model.

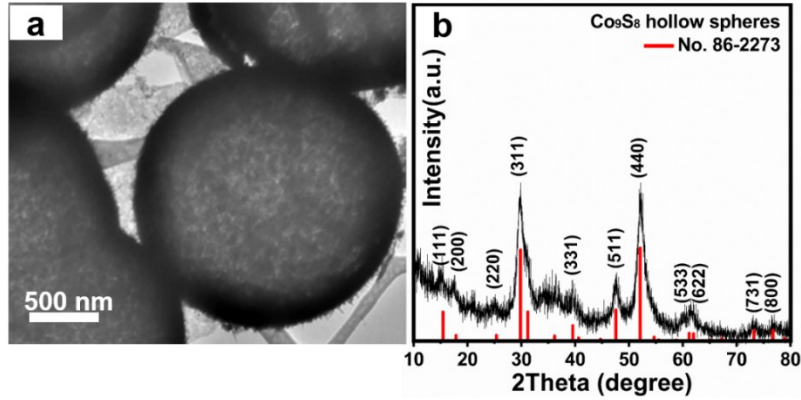

**Fig. S1.** (a) TEM image and (b) XRD pattern of  $\text{Co}_9\text{S}_8$  hollow spheres.

The TEM image shows the  $\text{Co}_9\text{S}_8$  hollow spheres with a diameter of  $\sim 2 \mu\text{m}$  consisted of numerous randomly assembled primary nanoparticles. The XRD pattern confirmed the component of pure  $\text{Co}_9\text{S}_8$  (JCPDS No. 86-2273).

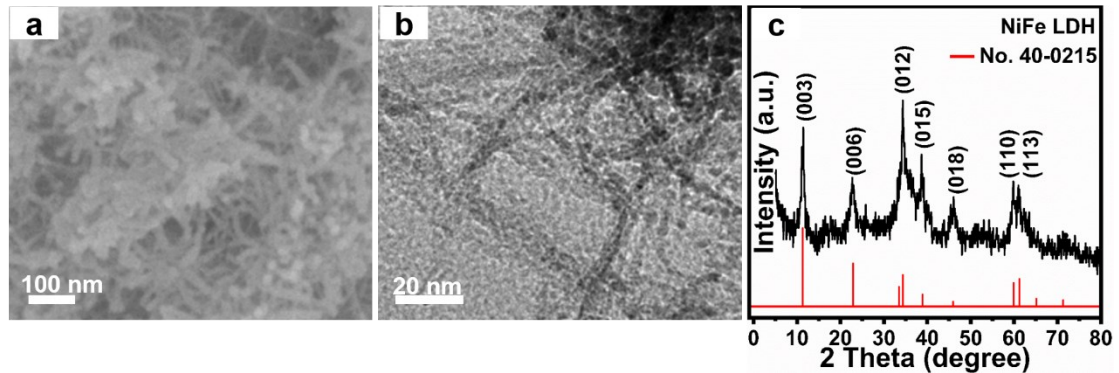

**Fig. S2.** (a) SEM image, (b) TEM image and (c) XRD pattern of NiFe LDH nanowires.

The SEM image in Fig. S2a shows that the NiFe LDH is composed of random interconnected nanowires that are inclined to aggregate. TEM is performed to further observe the detailed structure and morphology of NiFe LDH. As shown in Fig. S2b, each individual nanowire is assembled from numerous connected particles. The XRD pattern confirmed the component of pure NiFe LDH (JCPDS No. 40-0215).

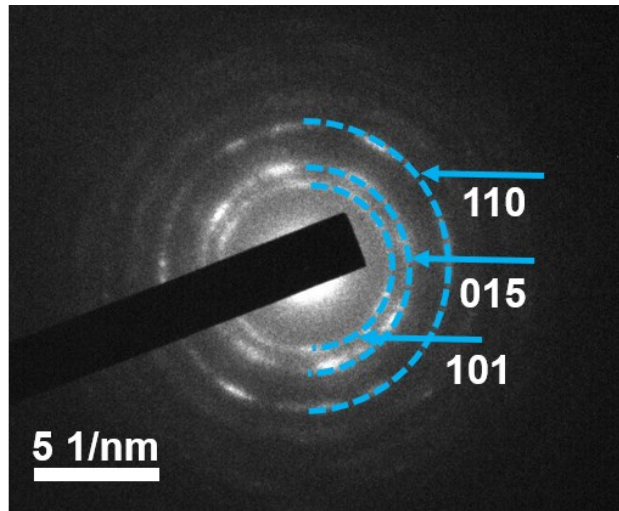

**Fig. S3.** SAED of NiFe LDH nanowires in the  $\text{Co}_9\text{S}_8@\text{NiFe}$  LDH.

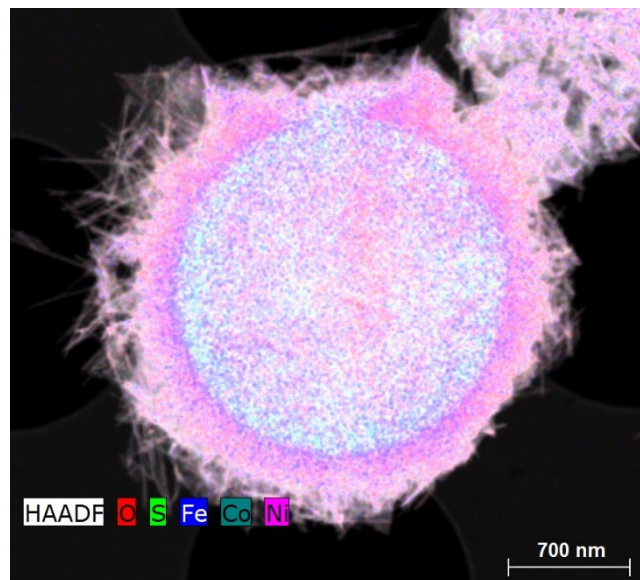

**Fig. S4.** EDS mapping for Co, Ni, Fe, S and O of  $\text{Co}_9\text{S}_8@\text{NiFe}$  LDH.

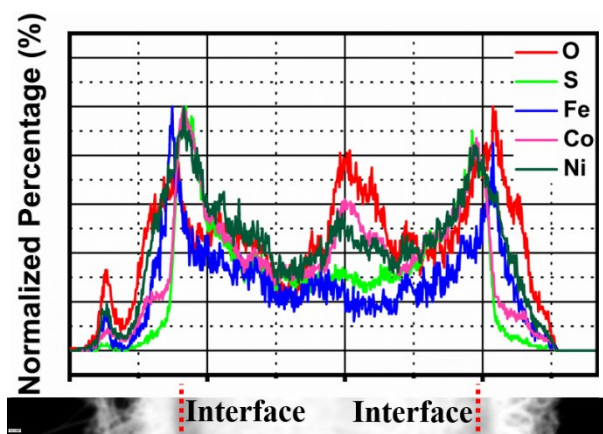

**Fig. S5.** EDS line scan of  $\text{Co}_9\text{S}_8@\text{NiFe LDH}$ .

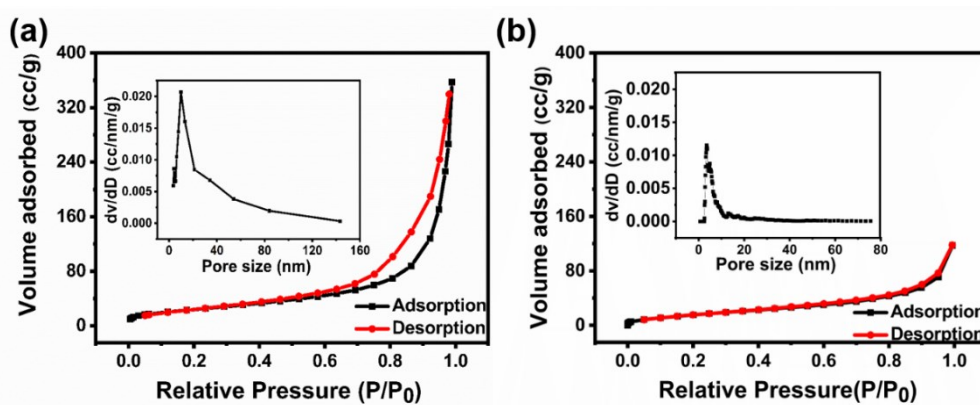

**Fig. S6.**  $\text{N}_2$  adsorption-desorption isotherms and corresponding pore size distribution curves of (a)  $\text{Co}_9\text{S}_8@\text{NiFe LDH}$  and (b)  $\text{Co}_9\text{S}_8$ .



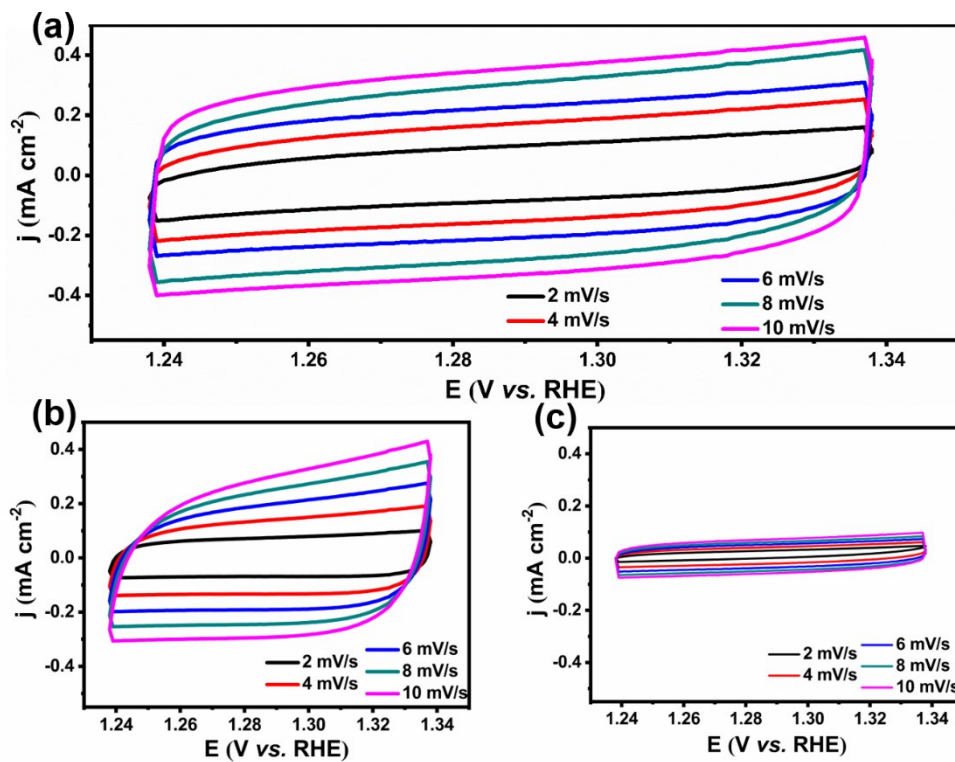

**Fig. S7.** CV measurement with various scan rates for (a) Co<sub>9</sub>S<sub>8</sub>@NiFe LDH, (b) Co<sub>9</sub>S<sub>8</sub> and (c) NiFe LDH in 1 M KOH.

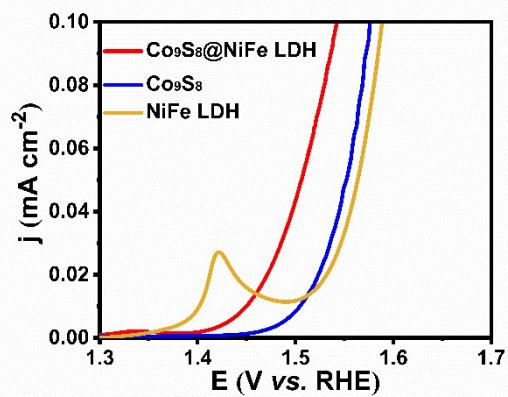

**Fig. S8.** ECSA-normalized polarization curves of Co<sub>9</sub>S<sub>8</sub>@NiFe LDH, Co<sub>9</sub>S<sub>8</sub> and NiFe LDH in 1 M KOH.

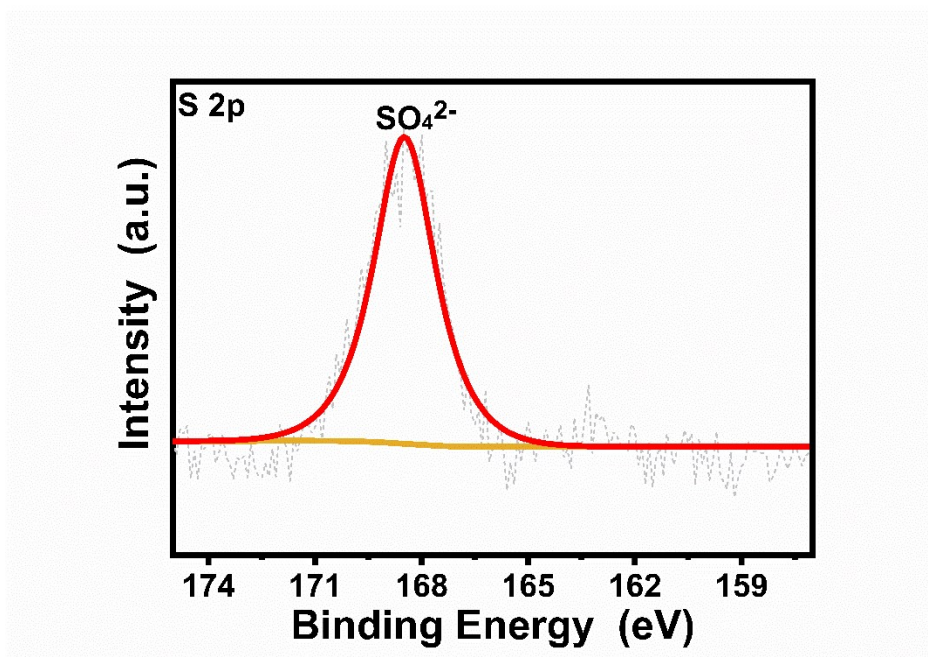

**Fig. S9.** High-resolution XPS spectrum of S 2p from pristine  $\text{Co}_9\text{S}_8$  after stability test for OER.

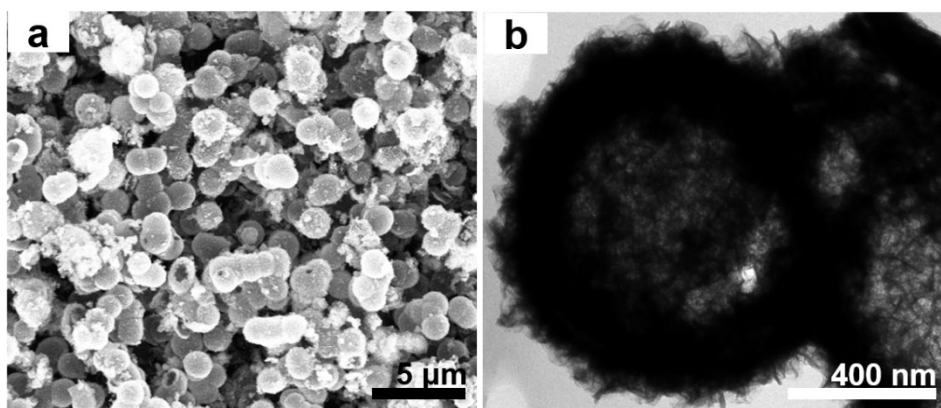

**Fig. S10.** (a) SEM image and (b) TEM image of pure  $\text{Co}_9\text{S}_8$  after stability test for OER.

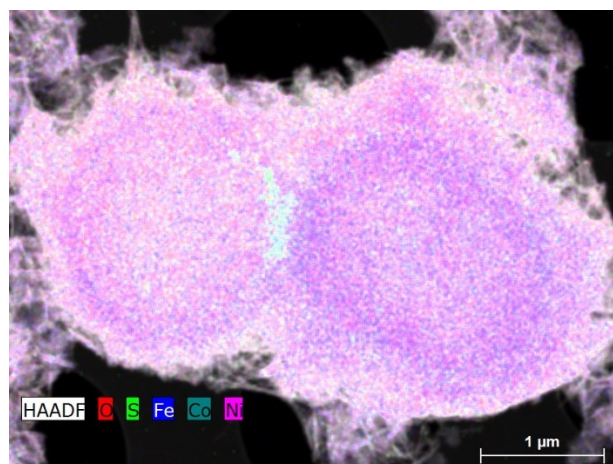

**Fig. S11.** EDS mapping of Co, S, Ni, Fe and O from  $\text{Co}_9\text{S}_8$ @NiFe LDH after 20-hrs stability test.

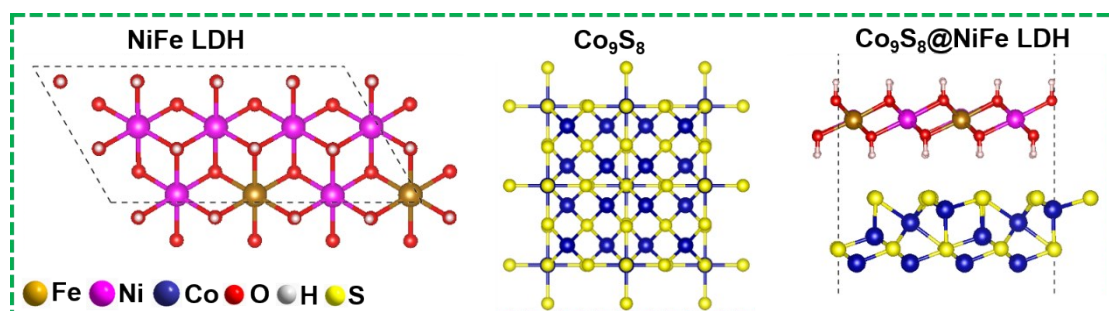

**Fig. S12.** The optimized crystal structures of NiFe LDH,  $\text{Co}_9\text{S}_8$  and  $\text{Co}_9\text{S}_8$ @NiFe LDH.

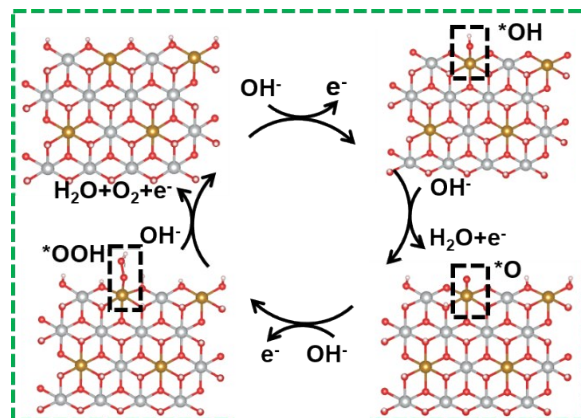

**Fig. S13.** illustration of the OER pathway on the NiFe LDH.

Schematic

**Table S1.** Comparison of OER activity of Co<sub>9</sub>S<sub>8</sub>@NiFe LDH with catalysts in previous literatures.

| Catalyst                                                                                     | Overpotential<br>(mV)<br>j=10 mA cm <sup>-2</sup> | Tafel<br>slope | Refs.                            |
|----------------------------------------------------------------------------------------------|---------------------------------------------------|----------------|----------------------------------|
| <b>Co<sub>9</sub>S<sub>8</sub>@NiFe LDH</b>                                                  | <b>220</b>                                        | <b>52.0</b>    | <b>This work</b>                 |
| Co <sub>9</sub> S <sub>8</sub> @NiCo LDH on nickel foam (NF) <sup>9</sup>                    | 278 <sup>a</sup>                                  | 83.0           | Sci. Bull. 2019                  |
| (Co,Ni)Se <sub>2</sub> @NiFe LDH hollow nanocages <sup>10</sup>                              | 277                                               | 75             | ACS Appl. Mater. Interfaces 2019 |
| NiFe LDH nanoplates/N-TiO <sub>2</sub> nanotube <sup>11</sup>                                | 235                                               | 48.9           | ACS Appl. Energy Mater. 2019     |
| hollow TiO <sub>2</sub> @Co <sub>9</sub> S <sub>8</sub> core-branch arrays <sup>12</sup>     | 240                                               | 55.0           | Adv. Sci. 2018                   |
| hollow CeO <sub>x</sub> /CoS hybrid nanostructure <sup>13</sup>                              | 269                                               | 50.0           | Angew. Chem. Int. Ed. 2018       |
| Ni <sub>3</sub> S <sub>2</sub> /NiS hollow core <sup>14</sup>                                | 298                                               | 59.8           | ACS Appl. Mater. Interfaces 2019 |
| hierarchical hetero-Ni <sub>3</sub> Se <sub>4</sub> @NiFe LDH micro/nanosheets <sup>15</sup> | 223                                               | 55.5           | Nanoscale Horiz. 2019            |
| NiO@NiFe-LDH on NF <sup>16</sup>                                                             | 265                                               | 72.0           | ACS Sustain. Chem. Eng. 2019     |
| N,S-rGO/WSe <sub>2</sub> /NiFe-LDH <sup>17</sup>                                             | 250                                               | 86.0           | ACS Appl. Mater. Interfaces 2017 |
| Ag <sub>2</sub> S-CoS hetero-nanowires <sup>18</sup>                                         | 275                                               | 77.1           | Catal. Commun. 2019              |

|                                                                    |     |      |                                  |
|--------------------------------------------------------------------|-----|------|----------------------------------|
| Co <sub>9</sub> S <sub>8</sub> hollow microplates <sup>19</sup>    | 278 | 53.0 | ACS Appl. Mater. Interfaces 2017 |
| Cobalt sulfide nanosheets <sup>20</sup>                            | 312 | 69.0 | ACS Appl. Energy Mater. 2019     |
| CuCo <sub>2</sub> S <sub>4</sub> nanosheets <sup>21</sup>          | 310 | 86.0 | ACS Catal. 2017                  |
| (NiFe)S <sub>2</sub> nanoparticles grown on graphene <sup>22</sup> | 320 | 61.0 | Electrochim. Acta 2018           |
| Graphdiyne@NiFe LDH composite <sup>23</sup>                        | 260 | 95.0 | ACS Appl. Mater. Interfaces 2019 |
| Ball-milled NiFe-LDH <sup>24</sup>                                 | 270 | 36.2 | Angew. Chem. Int. Ed. 2019       |
| Ni-Fe LDH hollow nanoprism <sup>25</sup>                           | 280 | 49.4 | Angew. Chem. Int. Ed. 2018       |
| Single-layer NiFe LDH nanosheets <sup>26</sup>                     | 300 | 40.0 | Nat. Commun. 2014                |

---

a: an overpotential at the current density of 30 mA cm<sup>-2</sup>

**Table S2.** Simulated elemental values of the fitted equivalent circuit corresponding to the EIS spectra in Fig. 3e.

|                    | Co <sub>9</sub> S <sub>8</sub> @NiFe LDH | Co <sub>9</sub> S <sub>8</sub> | NiFe LDH |
|--------------------|------------------------------------------|--------------------------------|----------|
| R <sub>s</sub> /Ω  | 0.70                                     | 0.68                           | 0.81     |
| R <sub>ct</sub> /Ω | 5.87                                     | 7.24                           | 9.96     |

## REFERENCES

- 1 J. Rossmeisl, Z.-W. Qu, H. Zhu, G.-J. Kroes, J.K. Nørskov, *J. Electroanal. Chem.*, 2007, **607**, 83-89.
- 2 A.V. 's, Z.-W. Qu, G.-J. Kroes, *J. Phys. Chem. C*, 2008, **112**, 9872–9879.
- 3 I.C. Man, H.-Y. Su, F. Calle-Vallejo, H.A. Hansen, J.I. Martinez, N.G. Inoglu, J. Kitchin, T.F. Jaramillo, J.K. Nørskov, J. Rossmeisl, *ChemCatChem*, 2011, **3**, 1159-1165.
- 4 CRC Handbook of Chemistry and Physics, 84th Edition, *J. Am. Chem. Soc.* 2004, **126**.
- 5 C.-Z. Yuan, Z.-T. Sun, Y.-F. Jiang, Z.-K. Yang, Nan Jiang, Z.-W. Zhao, U.Y. Qazi, W.-H. Zhang, A.-W. Xu, *Small*, 2017, **13**, 1604161.
- 6 S. Lee, L. Bai, X. Hu, *Angew. Chem. Int. Ed.*, 2020, **59**, 8072-8077.
- 7 S. Lee, K. Banjac, M. Lingenfelder, X Hu, *Angew. Chem. Int. Ed.*, 2019, **58**, 10295-10299.
- 8 R. Subbaraman, D. Tripkovic, K. Chang, D. Strmcnik, A. P. Paulikas, P. Hirunsit, M. Chan, J. Greeley, V. Stamenkovic, N. M. Markovic, *Nat. Mater.*, 2012, **11**, 550-557.
- 9 J. Yan, L. Chen, X. Liang, *Sci. Bull.*, 2019, **64**, 158–165.
- 10 J.G. Li, H. Sun, L. Lv, Z. Li, X. Ao, C. Xu, Y. Li, C. Wang, *ACS Appl. Mater. Interfaces*, 2019, **11**, 8106-8114.
- 11 X. Liu, Z. Chen, M. Cao, *ACS Appl. Energy Mater.*, 2019, **2**, 5960-5967.
- 12 S. Deng, Y. Zhong, Y. Zeng, Y. Wang, X. Wang, X. Lu, X. Xia, J. Tu, *Adv. Sci.*, 2018, **5**, 1700772.
- 13 H. Xu, J. Cao, C. Shan, B. Wang, P. Xi, W. Liu, Y. Tang, *Angew Chem. Int. Ed. Engl.* 2018, **57**, 8654-8658.
- 14 J. Wang, H.C. Zeng, *ACS Appl. Mater. Interfaces*, 2019, **11**, 23180-23191.
- 15 T. Zhang, L. Hang, Y. Sun, D. Men, X. Li, L. Wen, X. Lyu, Y. Li, *Nanoscale Horiz.*, 2019, **4**, 1132-1138.
- 16 S. Sirisomboonchai, S. Li, A. Yoshida, X. Li, C. Samart, A. Abudula, G. Guan, *ACS Sustain. Chem. Eng.*, 2018, **7**, 2327-2334.
- 17 X. Xu, H. Chu, Z. Zhang, P. Dong, R. Baines, P.M. Ajayan, J. Shen, M. Ye, *ACS Appl. Mater. Interfaces*, 2017, **9**, 32756-32766.
- 18 C. Lee, C. Lee, K. Shin, T. Song, H.Y. Jeong, D.Y. Jeon, H.M. Lee, *Catal. Commun.*, 2019, **129**, 105749.
- 19 H. Liu, F.X. Ma, C.Y. Xu, L. Yang, Y. Du, P.P. Wang, S. Yang, L. Zhen, *ACS Appl. Mater. Interfaces*, 2017, **9**, 11634-11641.
- 20 S. Ju, Y. Liu, H. Chen, F. Tan, A. Yuan, X. Li, G. Zhu, *ACS Appl. Energy Mater.*, 2019, **2**, 4439-4449.
- 21 M. Chauhan, K.P. Reddy, C.S. Gopinath, S. Deka, *ACS Catal.*, 2017, **7**, 5871-5879.
- 22 C. Liu, H. Ma, M. Yuan, Z. Yu, J. Li, K. Shi, Z. Liang, Y. Yang, T. Zhu, G. Sun, H. Li, S. Ma, *Electrochim. Acta*, 2018, **286**, 195-204.
- 23 G. Shi, C. Yu, Z. Fan, J. Li, M. Yuan, *ACS Appl. Mater. Interfaces*, 2019, **11**, 2662-2669.
- 24 D. Zhou, S. Wang, Y. Jia, X. Xiong, H. Yang, S. Liu, J. Tang, J. Zhang, D. Liu, L. Zheng, Y. Kuang, X. Sun, B. Liu, *Angew Chem Int Ed Engl*, 2019, **58**, 736-740.



- 25 L. Yu, J.F. Yang, B.Y. Guan, Y. Lu, X.W.D. Lou, *Angew Chem Int Ed Engl*, 2018, **57**, 172-176.
- 26 F. Song, X. Hu, *Nat Commun.*, 2014, **5**, 4477.
